# Supplementary material for: High visible-light photochemical activity of titania decorated on single-wall carbon nanotube aerogels
Source: Royal Society of Chemistry journal article supplement (doi:10.1039/c6ra03801h), 2016-01-01
Supplement: c6ra03801h1.pdf [file c6ra03801h1.pdf]

## **High Visible-Light Photochemical Activity of Titania Decorated on Single-Wall Carbon Nanotube Aerogels**

Hang-Ah Park, Siyuan Liu, Paul A. Salvador, Gregory S. Rohrer and Mohammad F. Islam\*

Department of Materials Science and Engineering, Carnegie Mellon University, 5000 Forbes Avenue, Pittsburgh, PA 15213, USA. E-mail: mohammad@cmu.edu

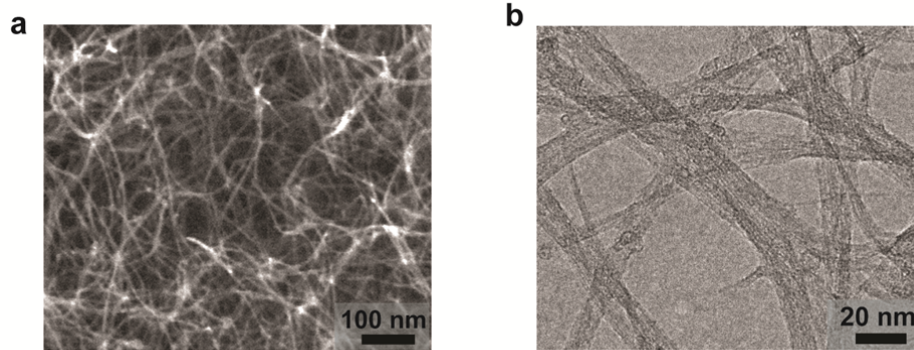

**Fig. S1.** a) High-resolution SEM and b) conventional TEM images of cross-sections of pristine single-wall carbon nanotube (SWCNT) aerogels.

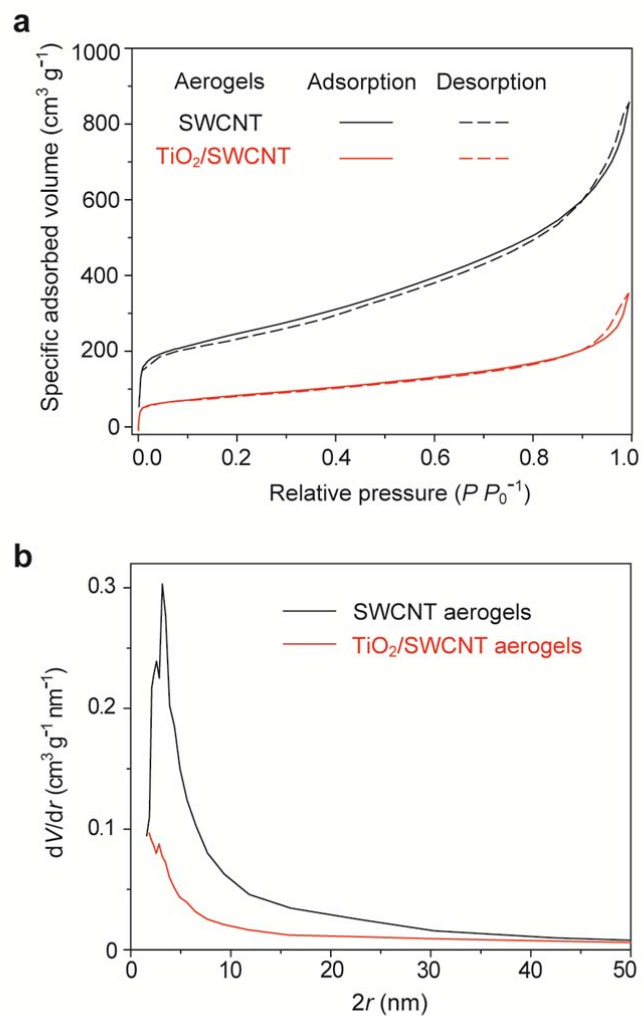

**Fig. S2.** a) Nitrogen adsorption–desorption isotherms of SWCNT and  $\text{TiO}_2/\text{SWCNT}$  aerogels with mass density of  $\approx 9 \text{ mg mL}^{-1}$  and  $\approx 36 \text{ mg mL}^{-1}$ , respectively. Specific adsorbed volume was calculated by dividing measured adsorbed volume by the mass of the sample and is plotted against the relative pressure,  $P/P_0^{-1}$ , where  $P$  and  $P_0$  are the equilibrium pressure and saturation pressure of nitrogen at the adsorption temperature of 77 K, respectively. b) Pore diameter distributions ( $dV/dr$ ) of SWCNT aerogels and  $\text{TiO}_2/\text{SWCNT}$  aerogels as a function of pore diameter ( $2r$ ). The pore characteristics within SWCNT aerogels can be tuned by changing the SWCNT concentration.<sup>1</sup>

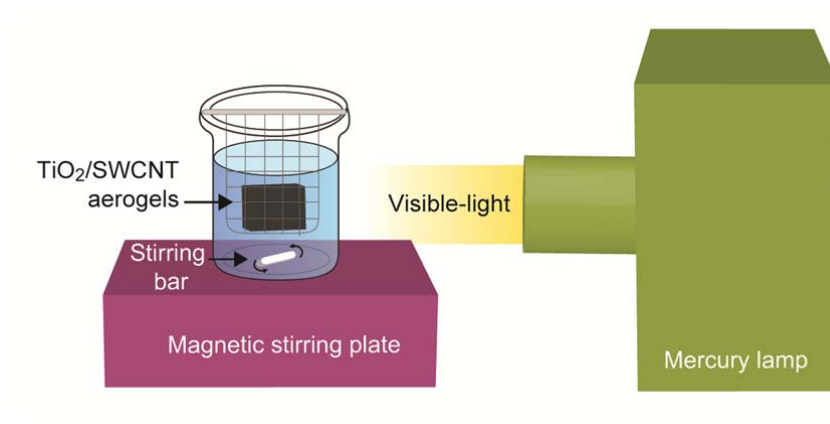

**Fig. S3.** Schematic illustration of photocatalytic dye degradation experimental setup.

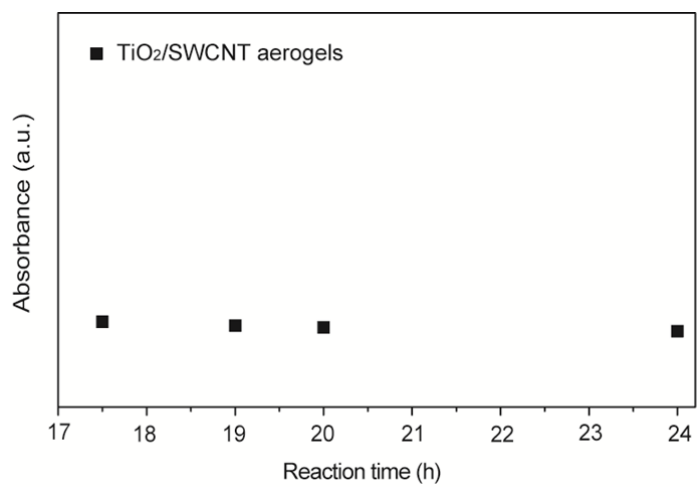

**Fig. S4.** Equilibration time for MB dye adsorption on TiO<sub>2</sub>/SWCNT aerogels in the dark.

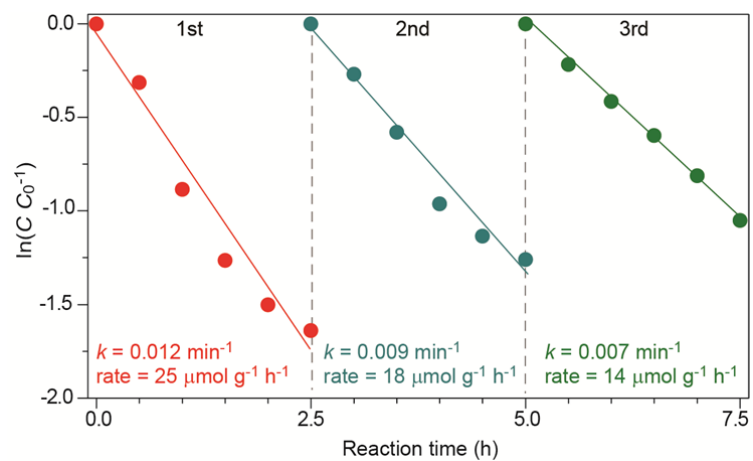

**Fig. S5.** Reusability of  $\text{TiO}_2/\text{SWCNT}$  aerogel composites for methylene blue dye degradation. The composites were rinsed in water after every 2.5 h of continuous use.

**Table S1.** Comparison of photocatalytic dye degradation performance by TiO<sub>2</sub> supported on carbon, graphene, or graphite.

| Photocatalysts                   | Light source, power, spectral range                 | Adsorption-desorption equilibration time [h] | Dye:titania molar ratio <sup>a</sup> | Degradation rate <sup>a</sup> [ $\mu\text{mol g}^{-1} \text{h}^{-1}$ ] | Rate constant <sup>a</sup> [ $\text{min}^{-1}$ ] | Ref.      |
|----------------------------------|-----------------------------------------------------|----------------------------------------------|--------------------------------------|------------------------------------------------------------------------|--------------------------------------------------|-----------|
| TiO <sub>2</sub> /SWCNT aerogels | Hg, 300 W, visible                                  | 24                                           | 0.004                                | 25                                                                     | 0.012                                            | This work |
|                                  |                                                     | 24                                           | 0.032                                | 200 <sup>b</sup>                                                       |                                                  |           |
|                                  |                                                     |                                              |                                      | 25 (with fresh 0.02 mM dye solution)                                   | 0.0015                                           |           |
| TiO <sub>2</sub> P25/graphene    | Xe, 500 W, visible                                  | 0.167                                        | 0.002                                | 13.4                                                                   | 0.013                                            | 2         |
| TiO <sub>2-x</sub> /graphene     | W, 500 W, visible                                   | 1                                            | 0.005                                | 9.5                                                                    | 0.0045                                           | 3         |
| TiO <sub>2</sub> /graphene       | Xe, 450 W, visible                                  | 1                                            | 0.0002                               | 25 <sup>c</sup>                                                        | 0.034                                            | 4         |
| TiO <sub>2</sub> /graphene       | Xe, 100 mW/cm <sup>2</sup> , AM 1.5 solar simulator | 0.5                                          | 0.003                                | 13.7                                                                   | 0.019                                            | 5         |
| TiO <sub>2</sub> /carbon-dot     | Xe, 1000 W, visible                                 | Overnight                                    | 0.012                                | 5.1                                                                    | 0.0047                                           | 6         |

<sup>a</sup> After dye adsorption to the samples had reached equilibrium in the dark.

<sup>b</sup> Estimated by taking the starting concentration of dyes before adsorption-desorption equilibration as  $C_0$ .

<sup>c</sup> Estimated by taking the starting concentration of dyes before adsorption-desorption equilibration as  $C_0$  because the dye concentrations after equilibration are not provided. As such, the degradation rates and rate constants are likely to be significantly overestimated, particularly if supports had large surface area for dye adsorption.

## References

1. K. H. Kim, Y. Oh and M. F. Islam, *Advanced Functional Materials*, 2013, **23**, 377-383.
2. H. Zhang, X. Lv, Y. Li, Y. Wang and J. Li, *ACS Nano*, 2010, **4**, 380-386.
3. M. Xing, X. Li and J. Zhang, *Scientific Reports*, 2014, **4**, 5493:1-7.
4. J. S. Lee, K. H. You and C. B. Park, *Advanced Materials*, 2012, **24**, 1084-1088.
5. M. Yang, Y. Liu, H. Wen, Z. Tang, H. Zhao, Y. Li and D. Wang, *ACS Nano*, 2013, **7**, 1504-1512.
6. G. Cui, W. Wang, M. Ma, M. Zhang, X. Xia, F. Hang, X. Shi, Y. Zhao, Y. Dong and B. Tang, *Chemical Communications*, 2013, **49**, 6415-6417.
